# Supplementary material for: Extraction of Bioactive Metabolites from Achillea millefolium L. with Choline Chloride Based Natural Deep Eutectic Solvents: A Study of the Antioxidant and Antimicrobial Activity
Source: MDPI journal article supplement (doi:10.3390/antiox11040724), 2022-04-06
Supplement: s1 [file s1]

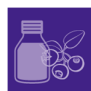**SUPPLEMENTARY MATERIAL****Extraction of bioactive metabolites from *Achillea Millefolium* L. with choline chloride based natural deep eutectic solvents; study of antioxidant and antimicrobial activity**

Milena Ivanović<sup>2</sup>, Dragana Grujić<sup>3</sup>, Janez Cerar<sup>1</sup>, Maša Islamčević Razboršek<sup>2</sup>, Ljiljana Topalić-Trivunović<sup>3</sup>, Aleksandar Savić<sup>3</sup>, Drago Kočar<sup>1</sup>, Mitja Kolar<sup>1,\*</sup>

<sup>1</sup>University of Ljubljana, Faculty of Chemistry and Chemical Technology, Večna pot 113, SI-1000 Ljubljana, Slovenia

<sup>2</sup>University of Maribor, Faculty of Chemistry and Chemical Engineering, Smetanova ulica 17, SI-2000 Maribor, Slovenia

<sup>3</sup>University of Banja Luka, Faculty of Technology, Vojvode Stepe Stepanovića 73, 78000 Banja Luka, Bosnia and Herzegovina

Corresponding author: mitja.kolar@fkkt.uni-lj.si (Tel.: +386-1-479-8694)

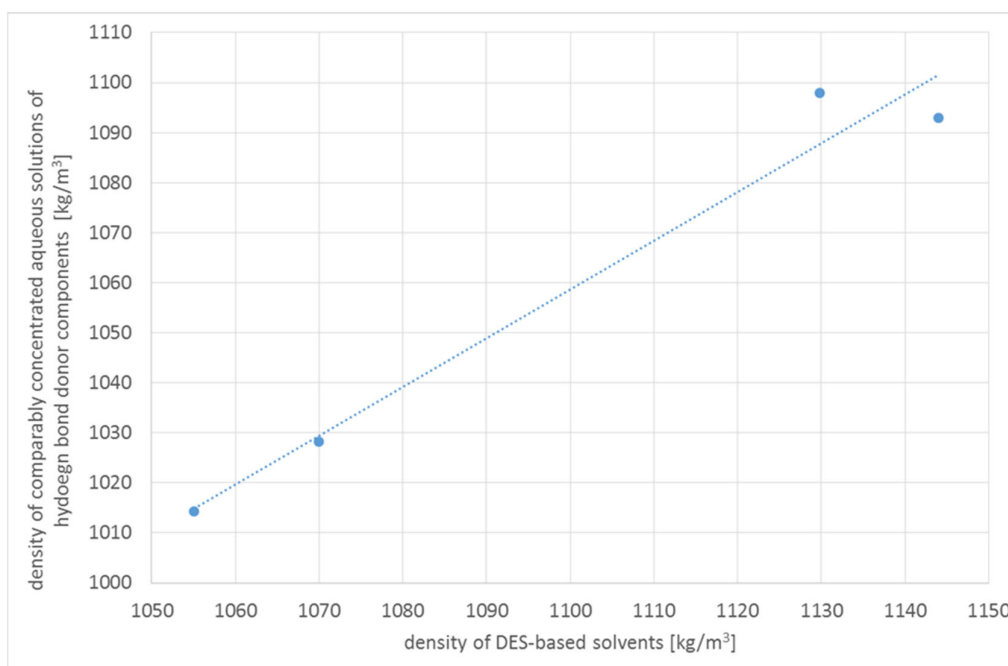

**Figure S1.** Correlation between the density of the studied NADES (the point for choline chloride:fructose:water DES is omitted) and the density of aqueous solutions containing hydrogen bond donor (HBD) components (1,4-butanediol, 1,2-propanediol, lactic acid, and urea, respectively) of comparable concentrations. The data refer to the temperature 25 °C (298.15 K).

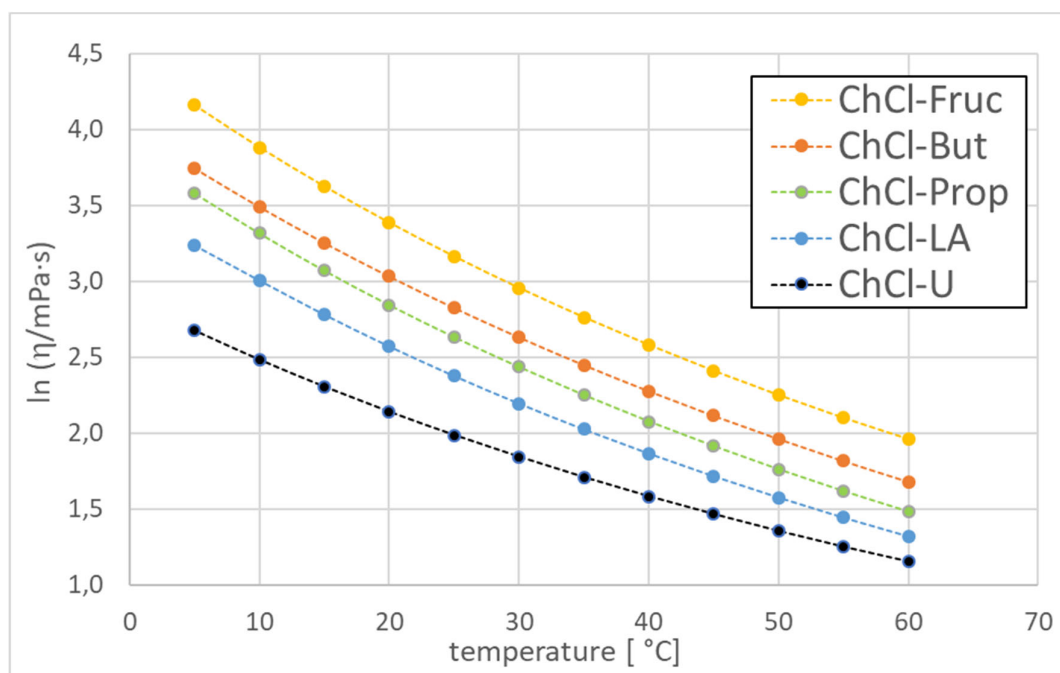

**Figure S2.** Temperature dependence of  $\eta$  (logarithmic scale) of the studied NADES containing 25% water (w:w) as described by the VFT model (broken lines) in comparison with the experimental data (points).

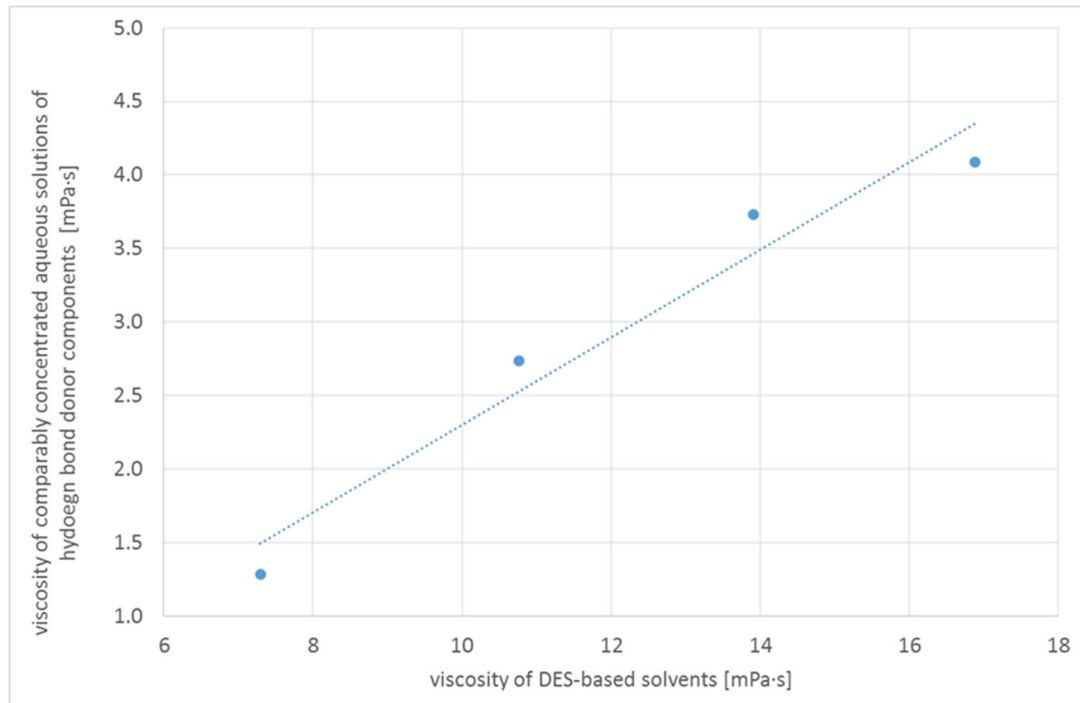

**Figure S3.** Correlation between the viscosity of the studied NADES (the point for choline chloride:fructose:water NADES is omitted) and the viscosity of aqueous solutions containing HBD components (1,4-butanediol, 1,2-propanediol, lactic acid, and urea, respectively) of comparable concentrations. The data refer to the temperature 25 °C (298.15 K).

| Concentration (% v:v)         | 12 %                                                                              | 10%                                                                               | 8%                                                                                 | 6%                                                                                  |
|-------------------------------|-----------------------------------------------------------------------------------|-----------------------------------------------------------------------------------|------------------------------------------------------------------------------------|-------------------------------------------------------------------------------------|
| <i>C. albicans</i> isolate    | 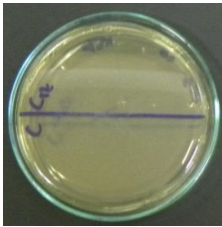 |  |  |  |
| <i>C. albicans</i> ATCC 10231 |  |  |  |  |

**Figure S4.** Antifungal activity (MIC) of urea-based NADES (ChCl-U) on *Candida albicans* ATCC 10231 (C) and *Candida albicans* isolate (Ci).

|      | ChCl-U (pure solvent)                                                               | ChCl-U (extract)                                                                     |
|------|-------------------------------------------------------------------------------------|--------------------------------------------------------------------------------------|
| 100% | 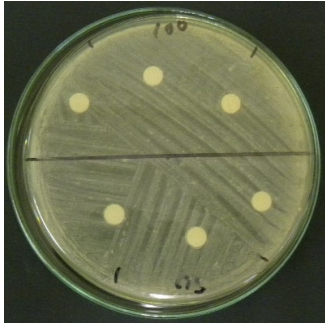  |   |
| 50%  |  |  |

**Figure S5.** Antimicrobial activity of choline chloride-urea based NADES (ChCl-U; pure solvent) and ChCl-U extract on *Staphylococcus aureus* ATCC 25923 (disk diffusion method).

**Table S1.** Values of empirical coefficients from the Vogel-Fulcher-Tammann (VFT) equation (eq. 1 in the manuscript) obtained by fitting the VFT model to experimental data for the studied NADES. The temperature range of fitting was 5–60 °C (278.15–333.15 K).

| NADES     | $\ln (A/\eta^\circ)$ | $B$ [K] | $T_0$ [K] | $\eta$ range (mPa·s) |
|-----------|----------------------|---------|-----------|----------------------|
| ChCl-LA   | -3.167               | 821.09  | 150.03    | 25.5–3.7             |
| ChCl-But  | -3.419               | 971.92  | 142.52    | 42.4–25.4            |
| ChCl-Prop | -3.259               | 849.02  | 154.03    | 35.9–4.4             |
| ChCl-Fruc | -2.946               | 870.89  | 155.61    | 64.1–7.1             |
| ChCl-U    | -2.279               | 612.87  | 154.48    | 14.5–3.2             |
